# Supplementary material
Source: PubMed Central journal article supplement (PMC5959802)
Supplement: NIHMS965101-supplement-Supplemental_Figures.pdf [file NIHMS965101-supplement-Supplemental_Figures.pdf]

## Supporting Information

### Identification of the First Diketomorpholine Biosynthetic Pathway Using FAC-MS Technology

Matthew T. Robey<sup>1</sup>, Rosa Ye<sup>2</sup>, Jin Woo Bok<sup>3</sup>, Kenneth D. Clevenger<sup>4</sup>, Md Nurul Islam<sup>2</sup>, Cynthia Chen<sup>2</sup>, Raveena Gupta<sup>3</sup>, Michael Swyers<sup>2</sup>, Edward Wu<sup>2</sup>, Peng Gao<sup>4</sup>, Paul M. Thomas<sup>1,4</sup>, Chengcang C. Wu<sup>2,6</sup>, Nancy P. Keller<sup>3,6</sup>, and Neil L. Kelleher<sup>1,4,5,6</sup>

<sup>1</sup>Department of Molecular Biosciences, Northwestern University, Evanston, Illinois, USA.

<sup>2</sup>Intact Genomics, Inc., St Louis, Missouri, USA.

<sup>3</sup>Department of Medical Microbiology and Immunology and Department of Bacteriology, University of Wisconsin-Madison, Madison, Wisconsin, USA.

<sup>4</sup>Proteomics Center of Excellence, Northwestern University, Evanston, Illinois, USA.

<sup>5</sup>Department of Chemistry, Northwestern University, Evanston, Illinois, USA.

<sup>6</sup>Direct Correspondence to N.L.K (n-kelleher@northwestern.edu), N.P.K (npkeller@wisc.edu), and C.C.W (cwu@intactgenomics.com).

## Supplementary Information Table of Contents

| <b><u>Content</u></b>                                                                        | <b><u>Pages</u></b> |
|----------------------------------------------------------------------------------------------|---------------------|
| Figure S1. Fungal diketomorpholine indole alkaloids                                          | 2S                  |
| Figure S2. MS/MS structural data for acu-dioxomorpholine A and B                             | 3S                  |
| Figure S3. Atom tracking in acu-dioxomorpholine B biosynthesis                               | 4S                  |
| Figure S4. MS/MS spectra of [D <sub>5</sub> -indole]-Trp labeled acu-dioxomorpholine A and B | 5S                  |
| Table S1. Predicted Open Reading Frames on FAC AaFAC30-6A16.                                 | 6S-7S               |
| Figure S5. Genetic deletions of predicted acu-dioxomorpholine BGC genes                      | 8S                  |
| Figure S6. Multiple sequence alignment of AdxB, phenylpyruvate reductase                     | 9S                  |
| Figure S7. Adenylation domain substrate predictions for AdxA                                 | 10S                 |
| Figure S8. Bioinformatics analysis of the first condensation domain of AdxA                  | 11S                 |
| Figure S9. Two possible roles for AdxA Arg197                                                | 12S                 |
| Figure S10. Multiple sequence alignment of AdxC, aromatic prenyltransferase                  | 13S                 |
| Figure S11. Putative diketomorpholine or $\alpha$ -hydroxy acid BGCs                         | 14S                 |
| Supplementary Information References                                                         | 15S                 |

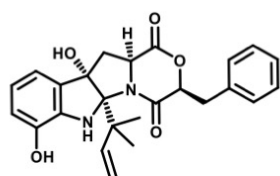

Shornephine A

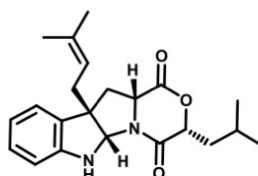

Mollenine A

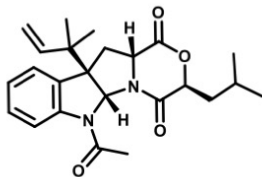

Javanicunine A

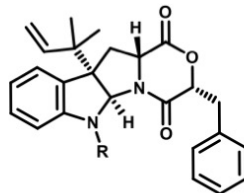

R = H (Acu-dioxomorpholine A)

R = Me (Acu-dioxomorpholine B)

**Figure S1.** Fungal diketomorpholine indole alkaloids.<sup>1,2,3,4,5,6</sup> Until this work, the biosynthesis of diketomorpholines was unknown.

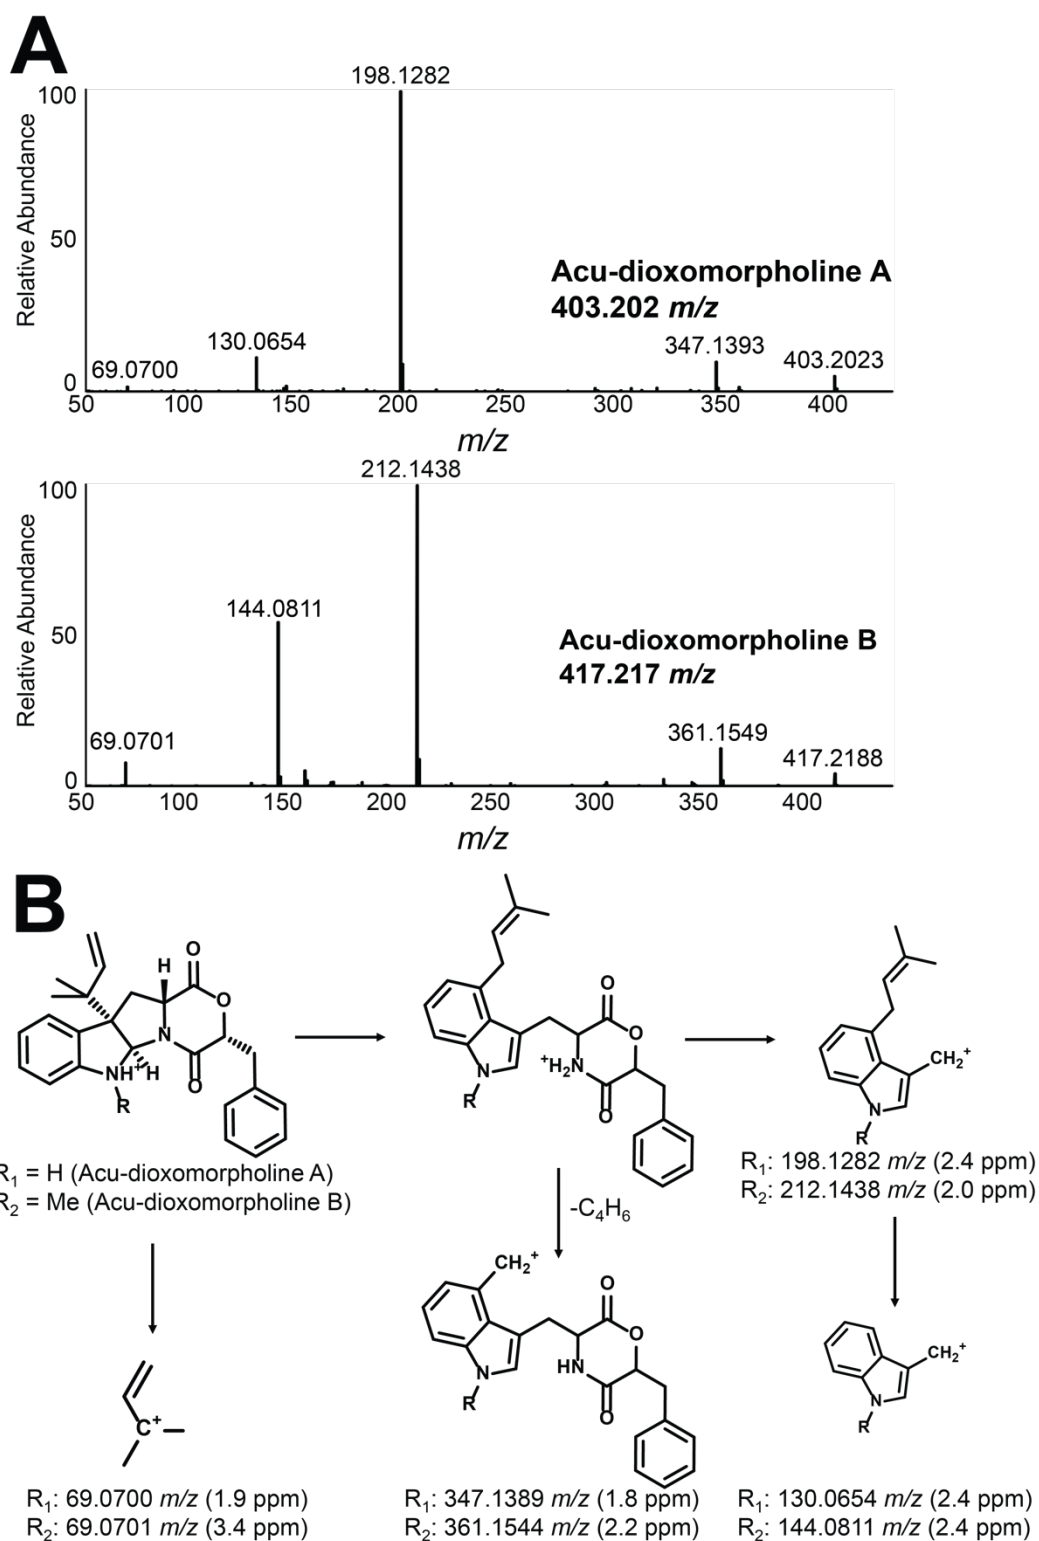

**Figure S2.** MS/MS structural data for acu-dioxomorpholine A and B. **A)** MS/MS spectra for acu-dioxomorpholine A and B are highly similar. Comparing the spectra for the two analogs, the three most intense peaks are related by  $\text{CH}_2$ . **B)** A proposed fragmentation pathway for acu-dioxomorpholine A and B. A predicted alkyl migration of the prenyl group to the C4 position results in highly stable indole fragment ions (at right).

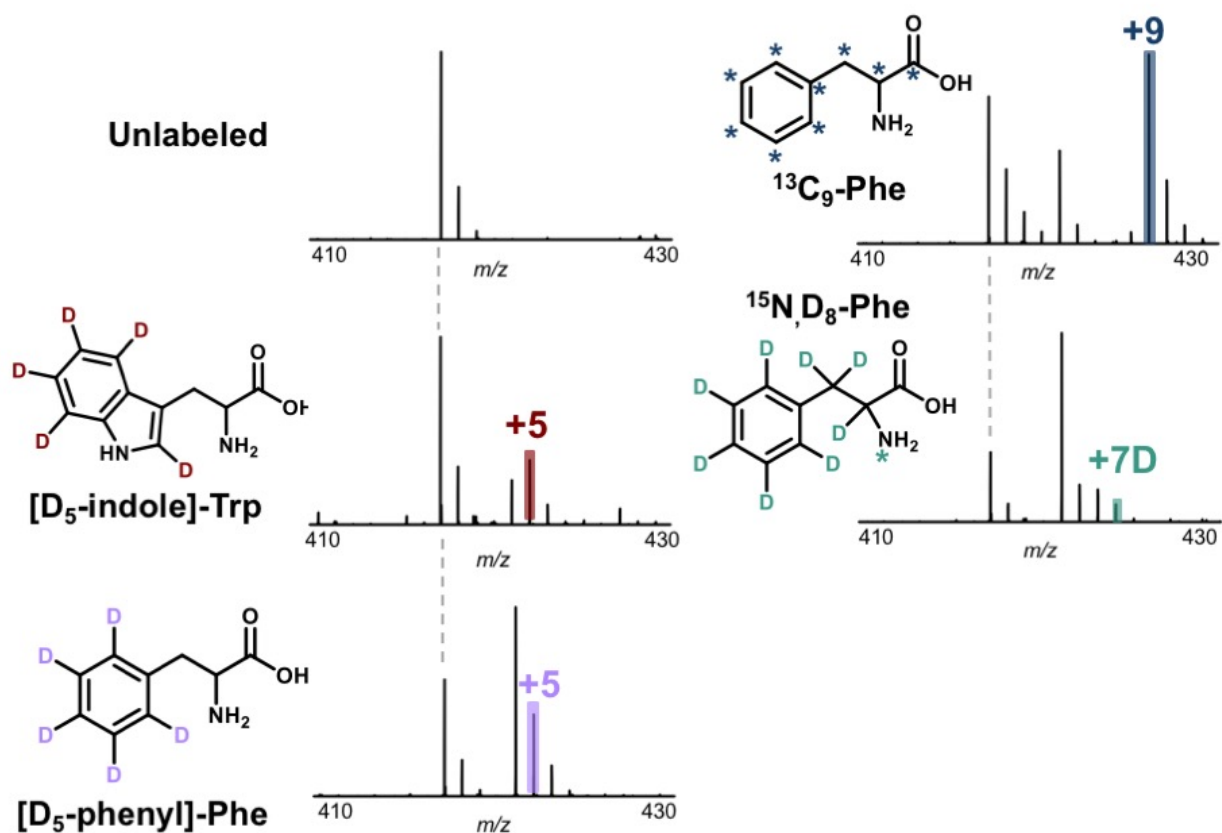

**Figure S3.** Atom tracking in acudioxomorpholine B biosynthesis using stable isotope labeling and MS. Data shown here corresponds to acudioxomorpholine A stable isotope labeling data in **Figure 3**. Feeding with (D<sub>5</sub>-indole)-Trp resulted in a shift of +5 Da (422.2487 *m/z*, 0.09 ppm error), confirming Trp is a precursor. A +4 labeled species was also detected, likely corresponding to loss of the C2 deuterium during prenylation and ring closure. Feeding with (D<sub>5</sub>-phenyl)-Phe resulted in a shift of +5 Da (422.24908 *m/z*, 1.0 ppm error), consistent with Phe being the source of the phenyl ring in acudioxomorpholine. Feeding with <sup>13</sup>C<sub>9</sub>-Phe resulted in a shift of +9 Da (426.2477 *m/z*, 0.4 ppm error), providing further support for phenylalanine incorporation. Feeding with D<sub>8</sub>, <sup>15</sup>N-Phe resulted in a shift of +7 Da (424.2615 *m/z*, 0.8 ppm error), indicating that phenylalanine is incorporated into acudioxomorpholine with loss of the nitrogen and a single deuterium. A +6 Da species was also detected from D<sub>8</sub>, <sup>15</sup>N-Phe labeling, likely resulting from phenylpyruvate tautomerization.

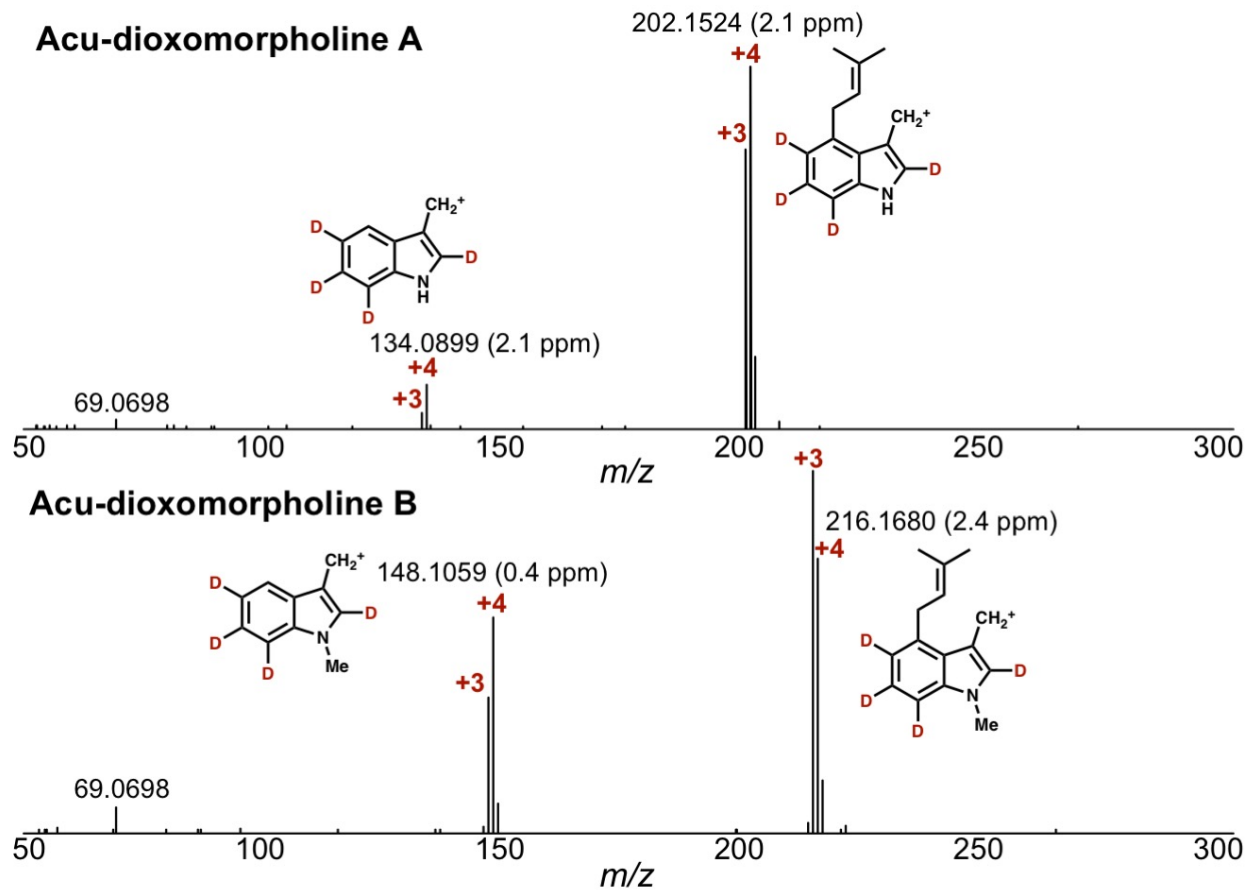

**Figure S4.** MS/MS spectra of [D<sub>5</sub>-indole]-Trp labeled acu-dioxomorpholine A and B. The major species correspond to retention of four deuterons, consistent with an alkyl migration that results in loss of a deuteron. Species corresponding to three deuterons likely result from loss of the C2 deuteron during fragmentation.

| Cluster Name | GenBank Accession | No. of Amino Acids | Closest Genbank Homolog                                                                           | Amino Acid Identity (%) |
|--------------|-------------------|--------------------|---------------------------------------------------------------------------------------------------|-------------------------|
|              | XP_020052745      | 827                | Calpain Family Cysteine Protease ( <i>Colletotrichum simmondsii</i> ) [KXH31552]                  | 417/896 (47%)           |
|              | XP_020052746      | 451                | Hypothetical Protein ( <i>Aspergillus bombycis</i> ) [XP_022388258]                               | 278/461 (62)            |
|              | XP_020052747      | 197                | TM2 Domain-Containing Protein 2 ( <i>Fusarium oxysporum f. sp. Cubense race 4</i> ) [EMT69206]    | 56/116 (28)             |
|              | XP_020052748      | 343                | Dihydroflavonol-4-Reductase ( <i>Capronia coronata CBS 617.96</i> ) [XP_007727020]                | 203/338 (59)            |
|              | XP_020052749      | 115                | Tyrosinase ( <i>Aspergillus nomius NRRL 13137</i> ) [XP_015404592]                                | 44/64 (38)              |
|              | XP_020052750      | 407                | Flavin-Containing Monooxygenase 1 ( <i>Diplodia corticola</i> ) [XP_020127287]                    | 115/352 (28)            |
|              | XP_020052751      | 368                | Alpha-1,6-Mannosyltransferase ( <i>Aspergillus niger</i> ) [GAQ45755]                             | 215/350 (58)            |
|              | XP_020052752      | 172                | Envelope Glycoprotein D ( <i>Talaromyces marneffeii PM1</i> ) [KFX48112]                          | 22/34 (13)              |
|              | XP_020052753      | 430                | Flavoheмоprotein ( <i>Aspergillus fumigatus var. RP-2014</i> ) [KEY80579]                         | 378/433 (88)            |
|              | XP_020052754      | 734                | Ankyrin Repeat Protein ( <i>Aspergillus fumigatus Z5</i> ) [KMK56345]                             | 204/721 (28)            |
|              | XP_020052755      | 682                | Sensor Histidine Kinase/Response Regulator ( <i>Aspergillus niger CBS 513.88</i> ) [XP_001398645] | 323/681 (47)            |
|              | XP_020052756      | 706                | Glucan 1,3-Beta-Glucosidase D ( <i>Aspergillus niger CBS 513.88</i> ) [XP_001394735]              | 549/708 (78)            |
|              | XP_020052757      | 267                | AhpC/TSA Family Thioredoxin Peroxidase ( <i>Aspergillus kawachii IFO 4308</i> ) [GAA85921]        | 240/266 (90)            |
|              | XP_020052758      | 435                | Peptidase M20 ( <i>Penicillium italicum</i> ) [KGO68526]                                          | 277/437 (64)            |
|              | XP_020052759      | 467                | Pantothenate Transporter ( <i>Aspergillus oryzae RIB40</i> ) [XP_003190219]                       | 406/467 (87)            |
|              | XP_020052760      | 223                | Acetyltransferase GNAT Domain Protein ( <i>Aspergillus parasiticus SU-1</i> ) [KJK67501]          | 85/223 (38)             |
|              | XP_020052761      | 157                | Mannose-Binding Lectin ( <i>Penicillium expansum</i> ) [XP_016596221]                             | 61/140 (39)             |
|              | XP_020052762      | 176                | Cytochrome P450 ( <i>Aspergillus parasiticus SU-1</i> ) [KJK61402]                                | 58/93 (33)              |
|              | XP_020052763      | 367                | Transaldolase ( <i>Talaromyces islandicus</i> ) [CRG84235]                                        | 241/364 (66)            |
|              | XP_020052764      | 765                | Transcription Factor, Fungi ( <i>Penicillium camemberti</i> ) [CRL25087]                          | 506/733 (66)            |
|              | XP_020052765      | 136                | RutC Family Protein YjgH ( <i>Aspergillus udagawae</i> ) [GAO81378]                               | 110/136 (80)            |
|              | XP_020052766      | 368                | N-Ethylmaleimide Reductase ( <i>Aspergillus kawachii IFO 4308</i> ) [GAA92790]                    | 274/361 (74)            |
|              | XP_020052767      | 505                | 60S Ribosomal Export Protein NMD3 ( <i>Aspergillus terreus NIH2624</i> ) [XP_001212120]           | 384/492 (76)            |
|              | XP_020052768      | 469                | Protein Ycf2 ( <i>Talaromyces islandicus</i> ) [CRG87194]                                         | 188/423 (44)            |
|              | XP_020052769      | 349                | Arrestin-Like, N-Terminal ( <i>Penicillium camemberti</i> ) [CRL18225]                            | 101/323 (33)            |
|              | XP_020052770      | 162                | Hypothetical Protein ( <i>Talaromyces islandicus</i> ) [CRG87192]                                 | 83/147 (56)             |
|              | XP_020052771      | 356                | Integral Membrane Protein ( <i>Aspergillus kawachii IFO 4308</i> ) [GAA92009]                     | 182/350 (52)            |
|              | XP_020052772      | 390                | Alcohol Dehydrogenase ( <i>Aspergillus kawachii IFO 4308</i> ) [GAA87592]                         | 285/391 (73)            |

| Cluster Name | GenBank Accession | No. of Amino Acids | Closest Genbank Homolog                                                                      | Amino Acid Identity (%) |
|--------------|-------------------|--------------------|----------------------------------------------------------------------------------------------|-------------------------|
| <b>adxA</b>  | XP_020052773      | 2413               | Nonribosomal Peptide Synthetase 10 ( <i>Penicillium subrubescens</i> ) [OKP06700]            | 810/2095 (39)           |
| <b>adxB</b>  | XP_020052774      | 378                | NADPH-Dependent Methylglyoxal Reductase ( <i>Aspergillus clavatus</i> NRRL 1) [XP_001276060] | 174/372 (47)            |
| <b>adxC</b>  | XP_020052775      | 422                | Aromatic Prenyltransferase, DMATS Type ( <i>Penicillium expansum</i> ) [XP_016600775]        | 224/428 (52)            |
|              | XP_020052776      | 135                | Protein of Unknown Function DUF4267 ( <i>Penicillium occitanis</i> ) [PCG98689]              | 64/126 (47)             |
|              | XP_020052777      | 1379               | ABC Transporter, Integral Membrane Type 1 ( <i>Penicillium expansum</i> ) [XP_016594290]     | 864/1423 (63)           |

**Table S1.** Predicted Open Reading Frames on FAC AaFAC30-6A16.



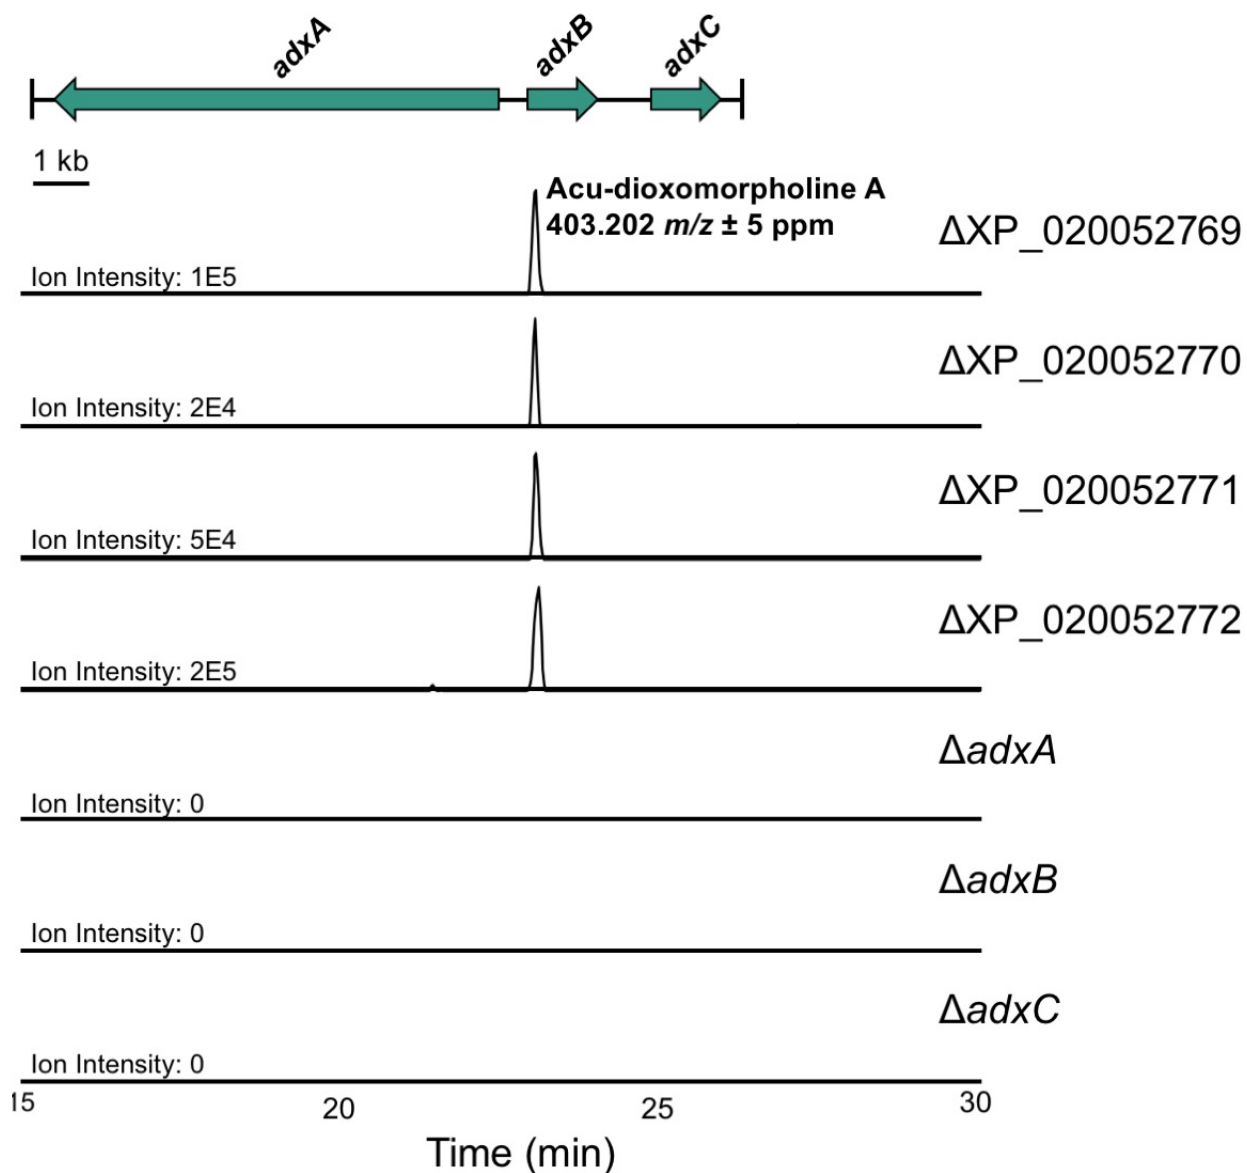

**Figure S5.** Genetic deletions of predicted acu-dioxomorpholine BGC genes. Acu-dioxomorpholine A production was completely abolished upon deletion of *adxA*, nonribosomal peptide synthetase; *adxB*, phenylpyruvate reductase; and *adxC*, prenyltransferase.

## NAD(P)H-Binding Motif

| AdxB                  |   | 1          | -----MNLALPPGSTVVV | TCAN   | YLA  | SHTSNE | 27 |
|-----------------------|---|------------|--------------------|--------|------|--------|----|
| sp Q9UUN9 ALD2_SPOSA  | 2 | --AKIDNAVL | PEGSLVLV           | TCAN   | FV   | SHVVEQ | 31 |
| sp Q0D1P7 TERH_ASPTN  | 1 | --MTVSSSIV | PPGGLVLV           | TCVT   | FIC  | SYIANG | 30 |
| sp Q03049 YD541_YEAST | 1 | -----      | MSNTVLV            | SCAS   | FIAL | LHILSQ | 21 |
| sp Q9UT59 YKJ7_SCHPO  | 1 | -----      | MSGKLVLV           | TCVT   | FIC  | AHVAEQ | 22 |
| sp Q9S9N9 CCR1_ARATH  | 1 | ---MPVDVAS | PAGKTVCV           | TCAG   | YIA  | SWIVKI | 29 |
| sp Q9SAH9 CCR2_ARATH  | 1 | -----      | MLVDGKLV           | CVTCAG | YIA  | SWIVKL | 24 |
| sp Q6K9A2 CCR1_ORYSJ  | 3 | SSFEANNNN  | NGEKQLV            | CVTCAG | FIC  | SWVKE  | 35 |
| sp P53111 ARI1_YEAST  | 1 | -----      | MTTDTTVFV          | SCAT   | FIAL | HIMND  | 23 |
| sp Q500U8 TKPR1_ARATH | 1 | -----      | MDQAKGKVCV         | TCAS   | FIA  | SWLVKR | 24 |
| sp O94563 YGD4_SCHPO  | 1 | -----      | MSELVLI            | TCIT   | FV   | SHSAEA | 21 |
| sp Q9SEV0 BAN_ARATH   | 1 | ---MDQTLT  | HTGSKKACV          | TCGT   | NLA  | SILIKH | 29 |
| sp Q12068 GRE2_YEAST  | 1 | -----      | MSVVF              | SCAN   | FIA  | AQHVDL | 19 |
| sp P51104 DFRA_DIACA  | 8 | TLGKHDINK  | VQGGETVCV          | TCAS   | FIC  | SWLMR  | 41 |
| sp Q9CA28 TKPR2_ARATH | 1 | -----      | MSEYLV             | TCGT   | FIA  | SYIIKS | 20 |
| sp D7U6G6 ANRPN_VITVI | 1 | ---MATQHP  | IGKKTACV           | VTG    | FV   | SLLVKL | 28 |
| sp Q5FB34 ANRCS_VITVI | 1 | ---MATQHP  | IGKKTACV           | VTG    | FV   | SLLVKL | 28 |
| sp Q9XE55 DFRA_MALDO  | 1 | -----      | MGSESESV           | CVTCAS | FIC  | SWLVMR | 24 |
| sp Q7PCC4 ANRCH_VITVI | 1 | ---MATQHP  | IGKKTACV           | VTG    | FV   | SLLVKL | 28 |
| sp P53183 YGD9_YEAST  | 1 | -----      | MTTEKTVFV          | SCAT   | FIAL | HVVDD  | 24 |

## Ser-Tyr-Lys Catalytic Triad

| AdxB                  |     | 144        | SMRRVVFIS | SMAL   | YTPN  | -PGQ      | QGLV | 168 | 204 | RQVEV | Y | SACK | MIC | EW   | AWEW    | 223 |
|-----------------------|-----|------------|-----------|--------|-------|-----------|------|-----|-----|-------|---|------|-----|------|---------|-----|
| sp Q9UUN9 ALD2_SPOSA  | 124 | SVKRFVLT   | STVS      | ALIPK  | -PN   | VEGY      |      | 148 | 172 | KSLWV | Y | AASK | TE  | EL   | AAWKF   | 191 |
| sp Q0D1P7 TERH_ASPTN  | 124 | SVKRFVFT   | S         | DQAAS  | NR    | --TTREIL  |      | 147 | 171 | RGWDV | Y | SAL  | KAQ | VE   | KEMWRF  | 190 |
| sp Q03049 YD541_YEAST | 120 | TVERVVVTS  | SCTAI     | ITLAK  | MDD   | PSV       |      | 145 | 162 | DGINA | Y | FASK | KA  | FAE  | KAWEF   | 181 |
| sp Q9UT59 YKJ7_SCHPO  | 127 | SIKRIVITS  | S         | FAAVGN | FQID  | PHNNKV    |      | 142 | 161 | NGIVA | Y | CASK | KL  | AE   | EAREY   | 180 |
| sp Q9S9N9 CCR1_ARATH  | 128 | KVKRVVITS  | S         | IGAVY  | MDPN  | -RDPEAV   |      | 142 | 159 | ---NW | Y | CYK  | M   | VAE  | QAAWET  | 175 |
| sp Q9SAH9 CCR2_ARATH  | 113 | KVKRVVFTS  | S         | IGAVY  | MNP   | -RDTQAI   |      | 137 | 154 | ---NW | Y | CYK  | M   | LA   | EQSAWET | 170 |
| sp Q6K9A2 CCR1_ORYSJ  | 122 | GVRRVVFTS  | S         | YGAVH  | MNP   | -RSPDAV   |      | 146 | 153 | ---NL | Y | CCAK | M   | MAE  | MATEE   | 179 |
| sp P53111 ARI1_YEAST  | 123 | TVEKVIVTS  | S         | TAA    | LVTP  | DMNKGDLV  |      | 147 | 164 | NAVA  | Y | CGSK | K   | FAE  | KTAWEF  | 183 |
| sp Q500U8 TKPR1_ARATH | 119 | SLKRVVLT   | SS        | STVR   | IRDD  | -FDPKIP   |      | 143 | 159 | --QVW | Y | ALSK | T   | LA   | EQAAWK  | 176 |
| sp O94563 YGD4_SCHPO  | 118 | KVKRFVYIS  | S         | EAA    | LKGP  | VNYFGDGHV |      | 143 | 162 | DELLN | Y | TVCK | K   | LGER | AMHAF   | 181 |
| sp Q9SEV0 BAN_ARATH   | 123 | SVKRVIIYTS | S         | AAAVS  | INNL  | -SGTGIV   |      | 147 | 164 | PFNWG | Y | PISK | V   | LA   | EKTAWEF | 183 |
| sp Q12068 GRE2_YEAST  | 119 | SVERVVLTS  | S         | YAAV   | FDMA  | KENDKSLT  |      | 143 | 160 | DPVNA | Y | CGSK | K   | FAE  | KAWEF   | 179 |
| sp P51104 DFRA_DIACA  | 135 | KLRRVVFTS  | S         | GGT    | VNVE  | --ATQKPV  |      | 157 | 174 | MTGWM | Y | FVSK | I   | LAE  | QAAWKY  | 193 |
| sp Q9CA28 TKPR2_ARATH | 117 | TLKRIVLT   | SS        | CS     | SIRY  | FD-ATEASP |      | 141 | 157 | --NLW | Y | GYAK | T   | LGER | EAWRI   | 174 |
| sp D7U6G6 ANRPN_VITVI | 122 | SVKRVILT   | S         | AAAV   | TINQL | -DGTGLV   |      | 146 | 163 | PPTWG | Y | PASK | T   | LA   | EKAAWKF | 182 |
| sp Q5FB34 ANRCS_VITVI | 122 | SVKRVILT   | S         | AAAV   | TINQL | -DGTGLV   |      | 146 | 163 | PPTWG | Y | PASK | T   | LA   | EKAAWKF | 182 |
| sp Q9XE55 DFRA_MALDO  | 119 | TVRKLVT    | S         | AGT    | VNVE  | --EHQKPV  |      | 141 | 158 | MTGWM | Y | FVSK | T   | LA   | EQAAWKY | 177 |
| sp Q7PCC4 ANRCH_VITVI | 122 | SVKRVILT   | S         | AAAV   | TINQL | -DGTGLV   |      | 146 | 163 | PPTWG | Y | PASK | T   | LA   | EKAAWKF | 182 |
| sp P53183 YGD9_YEAST  | 123 | TVEKVIVTS  | S         | VAA    | ALSP  | GMKDTSFV  |      | 148 | 165 | NAVSA | Y | CGSK | K   | FAE  | KTAWDF  | 184 |

**Figure S6.** Multiple sequence alignment of AdxB, phenylpyruvate reductase. AdxB contains an NAD(P)H binding motif and a Ser-Tyr-Lys catalytic triad characteristic of short chain dehydrogenase family enzymes.

| <b>A</b> | <b>NRPS</b>                | <b>Substrate</b> | <b>Specificity Code</b> |
|----------|----------------------------|------------------|-------------------------|
|          | NRPS13-A1<br>(BAH23995)    | Trp              | D-V-M-F-I-G-A-V-N-K     |
|          | RoqA-A1<br>(XP_002568558)  | Trp              | D-S-L-E-L-V-A-V-V-K     |
|          | AnaPS-A2<br>(XP_001258077) | Trp              | D-V-M-F-V-G-E-V-A-K     |
|          | <b>AdxA-A1</b>             | Trp              | D-A-G-I-V-G-A-C-A-K     |

  

| <b>B</b> | <b>NRPS</b>                               | <b>Substrate</b>                  | <b>Specificity Code</b> |
|----------|-------------------------------------------|-----------------------------------|-------------------------|
|          | Destruxin Synthetase-A2<br>(XP_007826232) | $\alpha$ -Hydroxy-<br>isocaproate | G-A-N-L-I-G-A-T-V-K     |
|          | Beauvericin Synthetase-A1<br>(AFJ44691)   | $\alpha$ -Hydroxy-<br>isovalerate | G-A-L-M-I-V-G-S-I-K     |
|          | Bassianolide Synthetase-A1<br>(AFP96785)  | $\alpha$ -Hydroxy-<br>isovalerate | G-A-L-M-V-V-G-S-I-K     |
|          | Enniatin Synthetase-A1<br>(CAA79245)      | $\alpha$ -Hydroxy-<br>isovalerate | G-A-L-H-V-V-G-S-I-K     |
|          | PF1022 Synthetase-A1                      | Phenyllactate                     | G-A-V-I-V-V-A-T-M-K     |
|          | <b>AdxA-A2</b>                            | Phenyllactate                     | G-G-F-I-Y-A-A-V-M-K     |

**Figure S7.** Adenylation domain substrate predictions for AdxA, nonribosomal peptide synthetase. (A) AdxA-A1 is proposed to activate Trp. Substrate binding residues are hydrophobic and similar to those of other Trp-activating adenylation domains. (B) AdxA-A2 is proposed to activate phenyllactate. Substrate binding residues are hydrophobic and similar to those of PF1022 synthetase which also activates phenyllactate. Residues are colored according to the Taylor coloring scheme.<sup>7</sup>

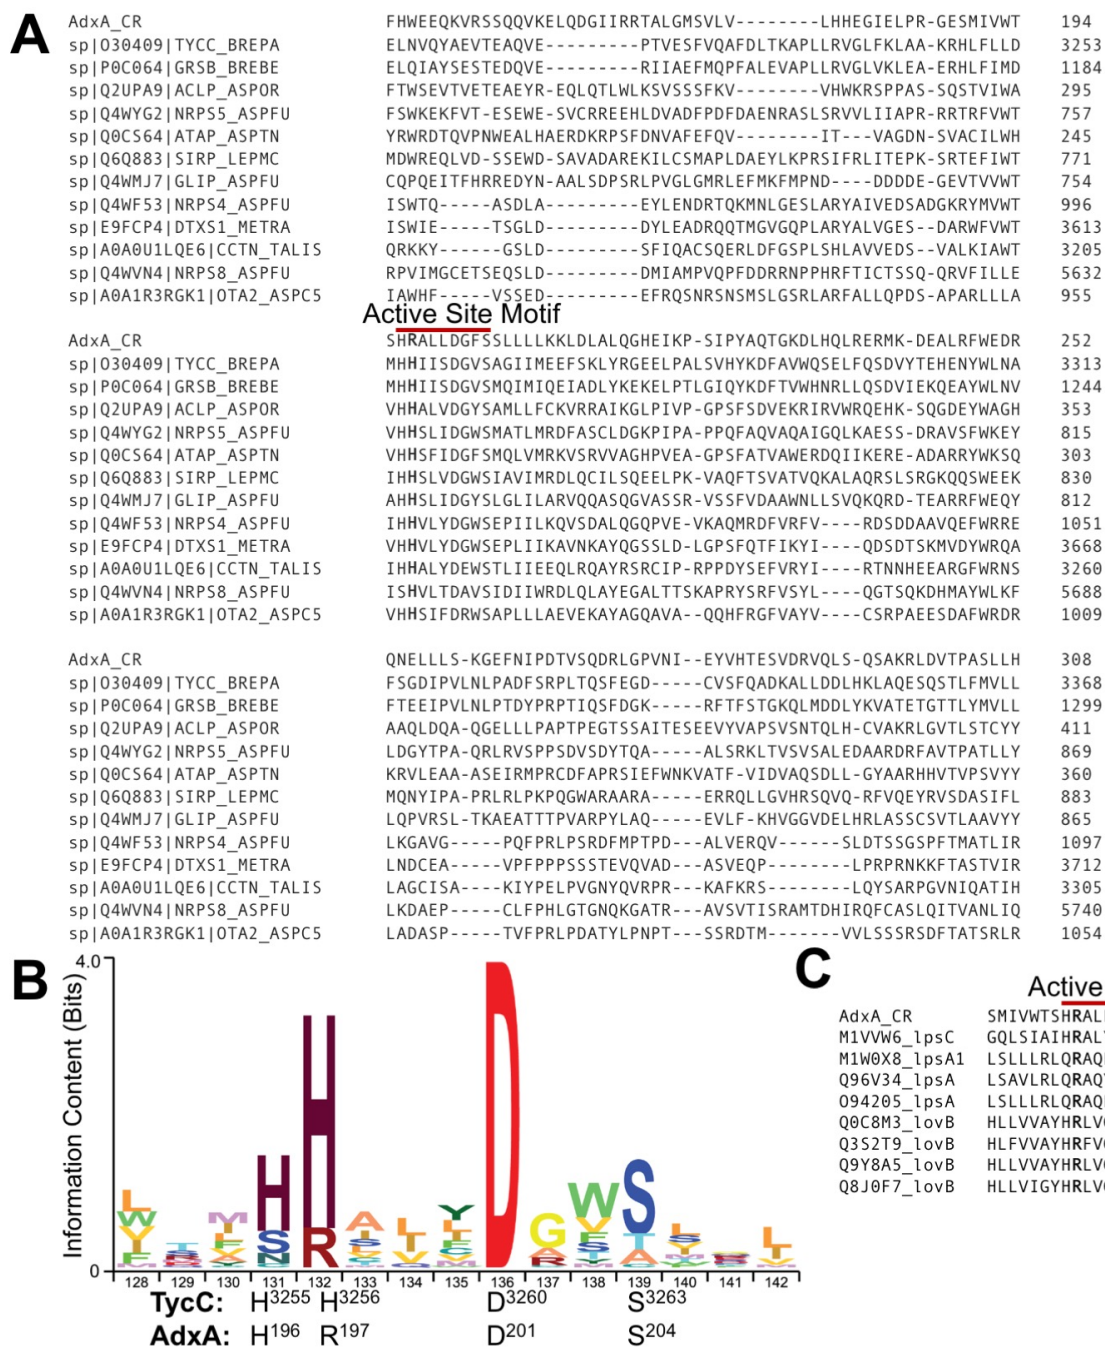

**Figure S8.** Bioinformatics analysis of the first condensation domain of AdxA. (A) AdxA-C1 has an arginine in place of the catalytic histidine observed in bacterial and fungal condensation domains. Sequences include AdxA-C1, the bacterial NRPS proteins TycC and GrsB, and the ten closest experimentally-characterized fungal homologs of AdxA-C1 from SwissProt. (B) A profile HMM generated from 240 fungal condensation domains in MIBiG reveals that eight other fungal condensation domains also contain an arginine in place of the usual catalytic histidine (H3256 for TycC). (C) Multiple sequence alignment of these eight condensation domains and AdxA-C1. The LpsA and LpsC condensation domains catalyze amide formation in the biosynthesis of D-lysergic acid peptides.<sup>8</sup> LovB does not catalyze amide formation; however, its precise role in lovastatin biosynthesis is unknown.<sup>9</sup>

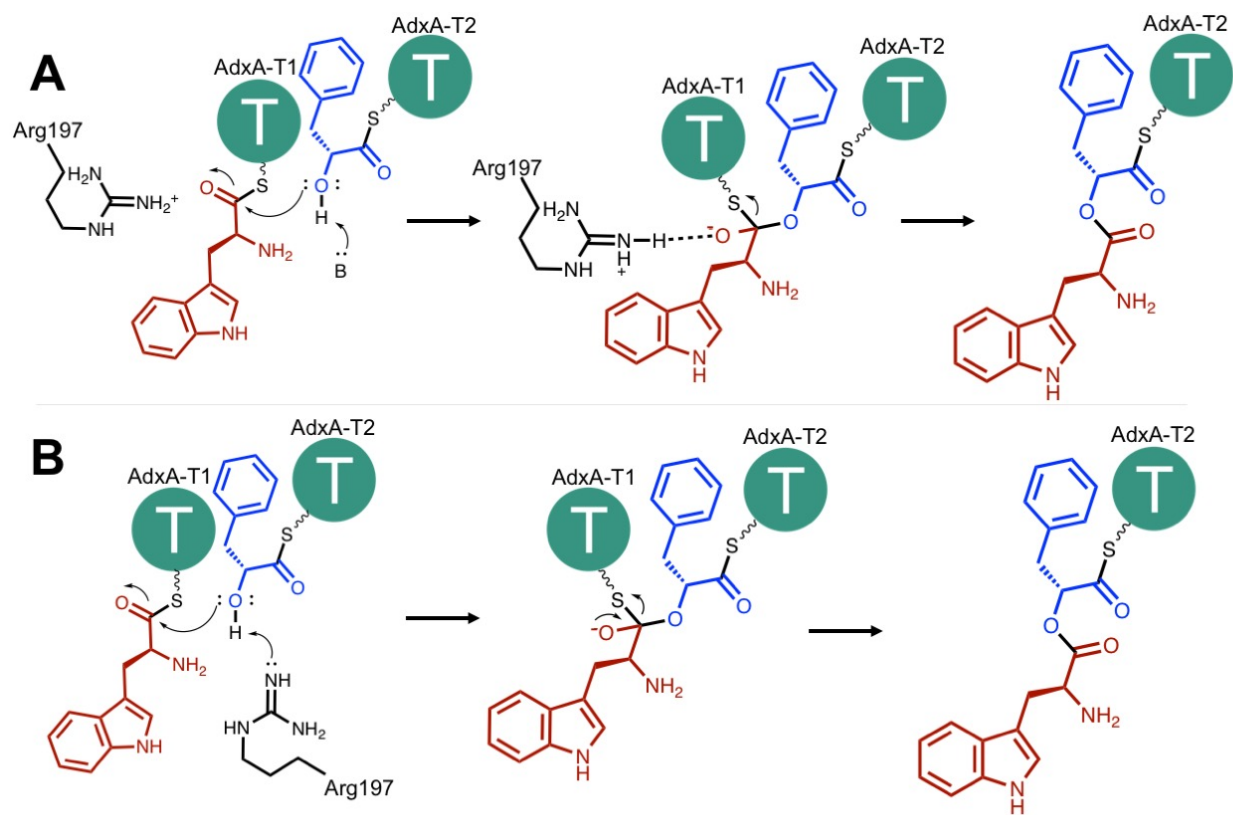

**Figure S9.** Two possible roles for AdxA Arg197. (A) Arg197 could act to stabilize the tetrahedral intermediate. Additional active site residues bind to the hydroxyl group of the phenyllactate-S-T intermediate to aid in nucleophilic attack. (B) Arg197 could act as a catalytic base, deprotonating the hydroxyl group of the phenyllactate-S-T intermediate for nucleophilic attack. Additional active site residues would bind to Arg197 to promote its availability as a Lewis base to deprotonate the hydroxyl of phenyllactate.

|                        |     |                                          |     |     |                          |               |
|------------------------|-----|------------------------------------------|-----|-----|--------------------------|---------------|
| AdxC                   | 84  | ELFQCILGSTG-PFELLSQNFTKS-RSTTRIAFEPTSHRA | 119 |     |                          |               |
| sp B6HJU1 ROQD_PENRW   | 88  | DIYKCLLGGTG-SVELLSQNVQKL-GLTARVAFEPYSYIA | 123 |     |                          |               |
| sp I4AY86 BREPT_ASPVE  | 84  | -KWRSTISRSLPIEFSLNFQKGSRRLLRIGFEPVNFLS   | 120 |     |                          | Indole -NH    |
| sp Q9C141 DMAW2_CLAP2  | 76  | ERWLSILTRCGLPLELSLNCTD---SVVRYAYEPINEMT  | 110 |     |                          | Binding       |
| sp A1DJ20 FTMT3_NEOFI  | 84  | D-----YH-PLFISQNFQRS-GSTIRLGFQPRAYSS     | 112 |     |                          |               |
| sp M1WA41 DMAW_CLAP2   | 76  | ERWLSILTRCGLPLELSLNCTD---SVVRYTYEPINEVT  | 110 |     |                          |               |
| sp Q50EL0 DMAW_ASPFU   | 76  | PRWLSILTRYGTPFELSLNCSN---SIVRYTFEPINQHT  | 110 |     |                          |               |
| sp P0CT20-2 DMAW_CLAPU | 92  | ERWLSILTRCGLPLELSLNCTD---SVVRYTYEPINEVT  | 126 |     |                          | DMAPP Binding |
| sp P0CT20 DMAW_CLAPU   | 76  | ERWLSILTRCGLPLELSLNCTD---SVVRYTYEPINEVT  | 110 |     |                          |               |
| sp Q6X2E3 DMAW_EPINE   | 76  | ERWLSILTRYGTPFELSLNCSN---SIVRYTYEPINAAT  | 110 |     |                          |               |
| sp Q6X2E1 DMAW2_EPICN  | 76  | ERWLSILTRYGTPFELSLNCSN---SIVRYTYEPINAAT  | 110 |     |                          | C4 Proton     |
| sp C5FTN3 DMAW_ARTOC   | 79  | NRWLSILTRYGTPFELSLNCSQ---SLVRYTYEPINSAT  | 123 |     |                          | Abstraction   |
| sp Q6X2E2 DMAW1_EPICN  | 76  | ERWLSILTRYGTPFELSLNCSN---SVVRYTYEPINAAT  | 110 |     |                          |               |
| sp Q6X1E1 DMAW_BALOB   | 76  | ERWLSILTRYGTPFELSLNCSN---SVVRYTYEPINEAT  | 110 |     |                          |               |
| sp Q12594 DMAW_CLAFS   | 75  | HTWPSVLTRYGIPFELSLNCLD---SVVRYTFEPTTEHT  | 109 |     |                          |               |
| sp D4AK48 DMAW_ARTBC   | 79  | NRWLSILTRYGTPFELSLNCSQ---SLVRYTYEPINSAT  | 113 |     |                          |               |
| sp D4D449 DMAW_TRIVH   | 79  | NRWLSILTRYGTPFELSLNCSQ---SLVRYTYEPINSAT  | 113 |     |                          |               |
| sp A1DA62 FTMB_NEOFI   | 88  | TQWRSGMVLTLGLPIEFSNNVAR---ALIRIGVDPVTADS | 122 |     |                          |               |
| sp Q4WAW7 FTMB_ASPFU   | 89  | TQWRSGMVLTLGLPIEFSNNVAR---ALIRIGVDPVTADS | 123 |     |                          |               |
| sp B9WZX3 FTMB_ASPFM   | 89  | TQWRSGMVLTLGLPIEFSNNVAR---ALIRIGVDPVTADS | 123 |     |                          |               |
|                        |     |                                          |     |     |                          |               |
| AdxC                   | 163 | IAKLPFKQTQILALDLDLPAG-ISVKEYFYFYP        | 198 | 254 | DLVDPHRTRLKFIYLAEF       | 270           |
| sp B6HJU1 ROQD_PENRW   | 168 | ISGTAWKTQILLALDLGQTG-ITIKKEYFYFYP        | 203 | 258 | DLVDPAAATRIKLYLMEL       | 274           |
| sp I4AY86 BREPT_ASPVE  | 165 | ---QLKSQGAFGDFNPDGAILVKGYVFP             | 198 | 255 | DLVEMSRQRVKIYGAHT        | 271           |
| sp Q9C141 DMAW2_CLAP2  | 154 | LVKEQIKTQNKLALDLKESQ-FALKVYFYFYP         | 189 | 254 | DLIDPAKSRVKIYLQEQ        | 270           |
| sp A1DJ20 FTMT3_NEOFI  | 158 | SLSPSFKTQGLLAVELPRTGSITLKGWFL            | 197 | 263 | DHVDMSRTRFKLYLYEC        | 289           |
| sp M1WA41 DMAW_CLAP2   | 154 | LVKEQIKTQNKLALDLKESQ-FALKVYFYFYP         | 189 | 254 | DLIDPAKSRVKIYLLEK        | 270           |
| sp Q50EL0 DMAW_ASPFU   | 154 | LVGGTIRTQNKLALDLKQGR-FALKTYIYYP          | 190 | 249 | DLTSPAKSRKIYILLEQ        | 266           |
| sp P0CT20-2 DMAW_CLAP  | 170 | LVKEQIKTQNKLALDLKESQ-FALKVYFYFYP         | 205 | 270 | DLIDPAKSRVKIYLLEK        | 286           |
| sp P0CT20 DMAW_CLAPU   | 154 | LVKEQIKTQNKLALDLKESQ-FALKVYFYFYP         | 189 | 254 | DLIDPAKSRVKIYLLEK        | 270           |
| sp Q6X2E3 DMAW_EPINE   | 154 | LVKEQIKTQNKLALDLKQGR-FALKTYIYYP          | 189 | 256 | DLVSPKSRVKIYLLEK         | 272           |
| sp Q6X2E1 DMAW2_EPICN  | 154 | LVKEQIKTQNKLALDLKQGR-FVLKTYIYYP          | 189 | 256 | DLVSPKSRVKIYLLER         | 272           |
| sp C5FTN3 DMAW_ARTOC   | 157 | LVGGQIRTQNKLALDLKGGN-FVLKTYIYYP          | 192 | 251 | DLIDPSKSRVKIYILEL        | 267           |
| sp Q6X2E2 DMAW1_EPICN  | 154 | LVKEQIKTQNKLALDLKQGR-FVLKTYIYYP          | 189 | 256 | DLISPTKSRVKIYLLER        | 272           |
| sp Q6X1E1 DMAW_BALOB   | 154 | LVNQCIRTQNKLALDLKQGR-FVLKTYIYYP          | 189 | 254 | DLMDPHKSRVKIYLHER        | 270           |
| sp Q12594 DMAW_CLAFS   | 153 | VNQQPIRTQNKLALDLKQGR-FALKVYLYYP          | 189 | 261 | DLVDPKSRVKIYILLEQ        | 287           |
| sp D4AK48 DMAW_ARTBC   | 157 | LVGGQIRTQNKLALDLKGGN-FVLKTYIYYP          | 192 | 251 | DLIDPSKSRVKIYILEL        | 277           |
| sp D4D449 DMAW_TRIVH   | 157 | LVGGQIRTQNKLALDLKGGN-FVLKTYIYYP          | 192 | 251 | DLIDPSKSRVKIYILEL        | 277           |
| sp A1DA62 FTMB_NEOFI   | 166 | LFKSPWKSQILTAMDQKSGTVLVKAYFYFYP          | 203 | 283 | DLVEPGKSRVKFYASER        | 299           |
| sp Q4WAW7 FTMB_ASPFU   | 167 | LFRSPWKSQILTAMDQKSGTVLVKAYFYFYP          | 204 | 284 | DLVEPGKSRVKFYASER        | 300           |
| sp B9WZX3 FTMB_ASPFM   | 167 | LFRSPWKSQILTAMDQKSGTVLVKAYFYFYP          | 204 | 284 | DLVEPGKSRVKFYASER        | 300           |
|                        |     |                                          |     |     |                          |               |
| AdxC                   | 342 | GRRAPIPKFIYFYP                           | 353 | 400 | HHQAWLSFSYARSKGPLYLTVYYH | 422           |
| sp B6HJU1 ROQD_PENRW   | 344 | GEALPKPKFIYFYP                           | 355 | 400 | DHQAWLSFSYTKKGPYLTMYH    | 422           |
| sp I4AY86 BREPT_ASPVE  | 345 | GSSFPVPKFIYLP                            | 356 | 403 | RLQSWISYSYAKKGVYMSVYFH   | 435           |
| sp Q9C141 DMAW2_CLAP2  | 341 | NDPMPPEPQVYFT                            | 352 | 399 | YLHSLVSFSYRR-NKPYLSVYLH  | 448           |
| sp A1DJ20 FTMT3_NEOFI  | 369 | GEKWPQPKVYFYP                            | 380 | 227 | GLQHVLVSFSYRPKTGPTTYVYVW | 453           |
| sp M1WA41 DMAW_CLAP2   | 341 | NNPMPPEPQVYFT                            | 352 | 399 | YLHAYISFSYRR-NKPYLSVYLH  | 448           |
| sp Q50EL0 DMAW_ASPFU   | 336 | NDPVPEPQVYFT                             | 347 | 398 | YLHAYISFSYRD-RTPYLSVYLQ  | 459           |
| sp P0CT20-2 DMAW_CLAPU | 357 | NDPMPPEPQVYFT                            | 368 | 415 | YLHAYISFSYRR-NKPYLSVYLH  | 464           |
| sp P0CT20 DMAW_CLAPU   | 341 | NDPMPPEPQVYFT                            | 352 | 399 | YLHAYISFSYRR-NKPYLSVYLH  | 448           |
| sp Q6X2E3 DMAW_EPINE   | 343 | NDPIPEPQVYFT                             | 354 | 401 | YIHSYISFSYRN-NKPYLSVYLH  | 450           |
| sp Q6X2E1 DMAW2_EPICN  | 343 | NDPIPEPQVYFT                             | 354 | 401 | YIHSYISFSYRN-NKPYLSVYLH  | 450           |
| sp C5FTN3 DMAW_ARTOC   | 338 | NQAMPEPQVYFT                             | 349 | 396 | YLHAYISFSYRK-GTPYLSVYLQ  | 446           |
| sp Q6X2E2 DMAW1_EPICN  | 343 | NDPIPEPQVYFT                             | 354 | 401 | YIHSYISFSYRK-NKPYLSVYLH  | 448           |
| sp Q6X1E1 DMAW_BALOB   | 341 | GDPMPPEPQVYFT                            | 352 | 399 | YLHTYISFSYRK-NKPYLSVYLH  | 465           |
| sp Q12594 DMAW_CLAFS   | 348 | DQMPPEPQVYFT                             | 359 | 406 | YLHTYVSFSYRK-NKPYLSVYLH  | 455           |
| sp D4AK48 DMAW_ARTBC   | 338 | DQAMPEPQVYFT                             | 349 | 385 | -----                    | 385           |
| sp D4D449 DMAW_TRIVH   | 338 | DQAMPEPQVYFT                             | 349 | 375 | -----                    | 375           |
| sp A1DA62 FTMB_NEOFI   | 371 | QSPFPDPQMYVC                             | 383 | 430 | HLCAVVSFAYKD-GGAYVTLVNH  | 463           |
| sp Q4WAW7 FTMB_ASPFU   | 373 | QSPFPDPQMYVC                             | 384 | 431 | HLCAVVSFAYKN-GGAYVTLVNH  | 464           |
| sp B9WZX3 FTMB_ASPFM   | 360 | -----                                    | 360 | 360 | -----                    | 360           |

**Figure S10.** Multiple sequence alignment of AdxC, aromatic prenyltransferase. AdxC has a glutamate predicted to bind to the substrate indole nitrogen and residues predicted to bind to DMAPP. AdxC lacks a lysine proposed to abstract the proton from the C4 position in 4-dimethylallyl tryptophan synthases, which is consistent with its proposed prenylation at C3.

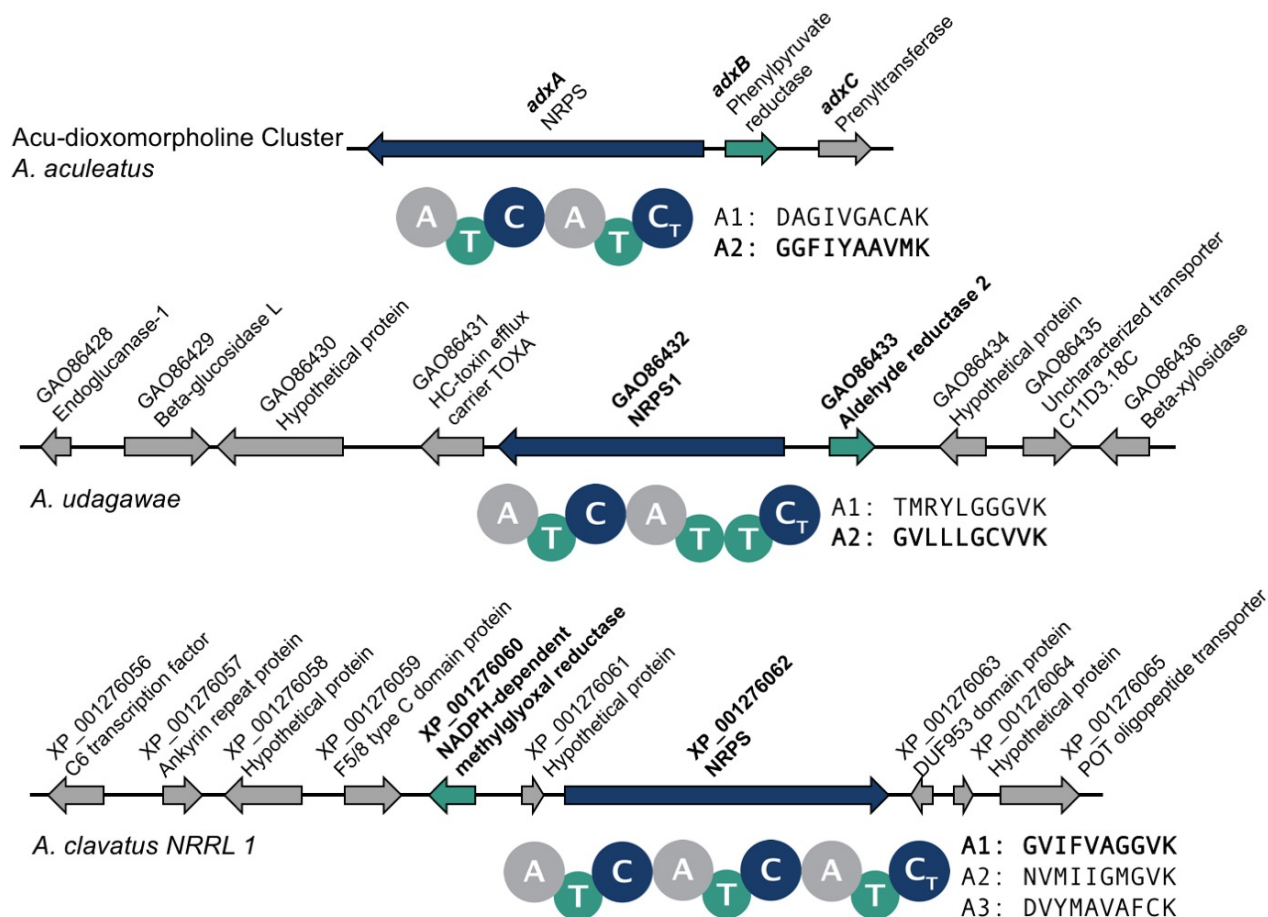

**Figure S11.** Putative diketomorpholine or  $\alpha$ -hydroxy acid BGCs. These clusters were identified by BLASTP searches of AdxB. Genes are labeled with their GenBank accession numbers and functional annotations. The *A. udagawae* and *A. clavatus* clusters each contain an NRPS adenylation domain with substrate-binding residues similar to those of AdxA-A2.

## Supporting Information References

- (1) Khalili, Z. G., Huang, X. C., Raju, R., Piggott, A. M., and Capon, R. J. (2014) Shomephine A: structure, chemical stability, and P-glycoprotein inhibitory properties of a rare diketomorpholine from an Australian marine-derived *Aspergillus* sp. *J. Org. Chem.* **79**, 8700-8705.
- (2) Aparicio-Cuevas, M. A., Rivero-Cruz, I., Sanchez-Castellanos, M., Menendez, D., Raja, H. A., Joseph-Nathan, P., Gonzalez, M. D. C., Figueroa, M. (2017) Dioxomorpholines and derivatives from a marine-facultative *Aspergillus* species. *J. Nat. Prod.* **80**, 2311-2318.
- (3) Wang, H. J., Gloer, J. B., Wicklow, D. T., and Dowd, P. F. (1998) Mollenines A and B: new dioxomorpholines from the ascostromata of *Eupenicillium molle*. *J. Nat. Prod.* **61**, 804-807.
- (4) Nakadate, S., Nozawa, K., Horie, H., Fujii, Y., Nagai, M., Komai, S., Hosoe, T., Kawai, K., Takashi, Y., and Fukushima, K. (2006) New dioxomorpholine derivatives, Javanicunine A and B, from *Eupenicillium javanicum*. *Heterocycles* **68**, 1969-1972.
- (5) Petersen, L. M., Hoeck, C., Frisvad, J. C., Gottfredsen, C. H., and Larsen, T. O. (2014) Dereplication guided discovery of secondary metabolites of mixed biosynthetic origin from *Aspergillus aculeatus*. *Molecules* **19**, 10898-10921.
- (6) Overy, D., Correa, H., Roullier, C., Chi, W. C., Pang, K. L., Rateb, M., Ebel, R., Shang, Z., Capon, R., Bills, G., and Kerr, R. (2017) Does osmotic stress affect natural product expression in fungi? *Mar. Drugs* **13**, E254.
- (7) Taylor, W. R. (1997) Residual colors: a proposal for aminochromography. *Protein Eng.* **10**, 743-746
- (8) Gerhards, N., Neubauer, L., Tudzynski, P., and Li, S. M. (2014) Biosynthetic pathways of ergot alkaloids. *Toxins* **6**, 3281-3295.
- (9) Ma, S. M., Li, J. W., Choi, J. W., Zhou, H., Lee, K. K., Moorthie, V. A., Xie, X., Kealey, J. T., Da Silva, N. A., and Tang, Y. (2009) Complete reconstitution of a highly reducing iterative polyketide synthase. *Science* **326**, 589-592.
